# Supplementary material
Source: PubMed Central journal article supplement (PMC8576851)
Supplement: NIHMS1750497-supplement-Appendices_1_and_2.pdf [file NIHMS1750497-supplement-Appendices_1_and_2.pdf]

## Appendix 1

Stimuli and lexical characteristics for AX **Word** Discrimination Task (Experiment 1).

Key: Word = English word; Sp. Trans = Spanish translation; Condition = Condition within the experiment; Eng. Log. Freq. = Log frequency in English (CLEARPOND); Eng. Ortho. N. = English Orthographic Neighborhood Size (CLEARPOND); Eng. Letters = Number of English letters; Sp. Log. Freq. = Log frequency in Spanish (CLEARPOND); Sp. Ortho. N. = Spanish Orthographic Neighborhood Size (CLEARPOND); Sp. Letters = Number of Spanish letters. \* indicates a cognate between English and Spanish.

| Word      | Sp. Trans    | Condition | Eng. Log. Freq. | Eng. Ortho. N. | Eng. Letters | Sp. Log. Freq. | Sp. Ortho. N. | Sp. Letters |
|-----------|--------------|-----------|-----------------|----------------|--------------|----------------|---------------|-------------|
| spa       | balneario    | S+Cons    | 3.67            | 7              | 3            | 2.97           | 0             | 9           |
| space*    | espacio      | S+Cons    | 4.82            | 7              | 5            | 4.90           | 2             | 7           |
| speaker   | altavoz      | S+Cons    | 3.84            | 2              | 7            | 3.05           | 0             | 7           |
| special*  | especial     | S+Cons    | 5.17            | 1              | 7            | 5.22           | 3             | 8           |
| specific* | específico   | S+Cons    | 4.25            | 1              | 8            | 4.01           | 2             | 10          |
| spider    | araña        | S+Cons    | 4.00            | 2              | 6            | 4.18           | 1             | 5           |
| spiral*   | espiral      | S+Cons    | 3.25            | 1              | 6            | 3.53           | 1             | 7           |
| spirit*   | espíritu     | S+Cons    | 4.69            | 1              | 6            | 4.75           | 1             | 8           |
| split     | dividido     | S+Cons    | 4.58            | 5              | 5            | 3.48           | 2             | 8           |
| sponge*   | esponja      | S+Cons    | 3.83            | 1              | 6            | 3.85           | 1             | 7           |
| spotless  | inmaculado   | S+Cons    | 3.07            | 0              | 8            | 2.83           | 1             | 10          |
| spread    | difundir     | S+Cons    | 4.50            | 1              | 6            | 3.05           | 0             | 8           |
| stable*   | estable      | S+Cons    | 4.12            | 5              | 6            | 4.11           | 3             | 7           |
| starch    | almidón      | S+Cons    | 3.13            | 1              | 6            | 2.95           | 0             | 7           |
| station*  | estación     | S+Cons    | 4.90            | 1              | 7            | 4.75           | 0             | 8           |
| stench    | hedor        | S+Cons    | 3.35            | 0              | 6            | 3.39           | 0             | 5           |
| stereo*   | estéreo      | S+Cons    | 3.78            | 1              | 6            | 3.56           | 0             | 7           |
| stocking  | media        | S+Cons    | 3.42            | 4              | 8            | 4.96           | 5             | 5           |
| stoic*    | estoico      | S+Cons    | 2.61            | 0              | 5            | 2.23           | 0             | 7           |
| stricken  | afligido     | S+Cons    | 3.17            | 0              | 8            | 3.12           | 1             | 8           |
| strict*   | estricto     | S+Cons    | 3.85            | 0              | 6            | 3.62           | 2             | 8           |
| strong    | fuerte       | S+Cons    | 4.94            | 2              | 6            | 5.29           | 4             | 6           |
| study*    | estudiar     | S+Cons    | 4.69            | 3              | 5            | 4.56           | 3             | 8           |
| stumble   | trastabillar | S+Cons    | 3.29            | 4              | 7            | 2.16           | 0             | 12          |

Running head: SPEECH PERCEPTION IN BILINGUALS

|             |                |         |      |   |    |      |    |    |
|-------------|----------------|---------|------|---|----|------|----|----|
| edge        | borde          | E+Onset | 4.37 | 5 | 4  | 4.23 | 4  | 5  |
| egg         | huevo          | E+Onset | 4.42 | 2 | 3  | 4.28 | 6  | 5  |
| elder       | mayor          | E+Onset | 3.85 | 4 | 5  | 5.26 | 1  | 5  |
| elevator    | ascensor       | E+Onset | 4.39 | 1 | 8  | 4.30 | 1  | 8  |
| effort      | esfuerzo       | E+Onset | 4.29 | 1 | 6  | 4.50 | 2  | 8  |
| ember       | brasa          | E+Onset | 2.34 | 2 | 5  | 2.90 | 4  | 5  |
| embrace     | abrazo         | E+Onset | 3.88 | 2 | 7  | 4.31 | 4  | 6  |
| empty       | vacío          | E+Onset | 4.67 | 0 | 5  | 4.49 | 2  | 5  |
| enable      | permitir       | E+Onset | 3.17 | 3 | 6  | 4.44 | 3  | 8  |
| enact       | promulgar      | E+Onset | 2.26 | 1 | 5  | 2.23 | 0  | 9  |
| elbow       | codo           | E+Onset | 3.79 | 1 | 5  | 3.73 | 16 | 4  |
| encroach    | invadir        | E+Onset | 1.78 | 0 | 8  | 3.60 | 1  | 7  |
| endeavor    | esfuerzo       | E+Onset | 3.17 | 1 | 8  | 4.50 | 2  | 8  |
| ending      | finalizando    | E+Onset | 4.20 | 8 | 6  | 2.66 | 0  | 11 |
| endless     | interminable   | E+Onset | 3.82 | 0 | 7  | 3.46 | 1  | 12 |
| enforcement | aplicación     | E+Onset | 3.82 | 0 | 11 | 3.43 | 0  | 10 |
| engaged     | comprometido   | E+Onset | 4.42 | 3 | 7  | 4.04 | 2  | 12 |
| engine      | motor          | E+Onset | 4.50 | 1 | 6  | 4.46 | 2  | 5  |
| enjoy       | disfrutar      | E+Onset | 4.92 | 2 | 5  | 4.25 | 5  | 9  |
| essay       | ensayo         | E+Onset | 3.79 | 1 | 5  | 4.38 | 1  | 6  |
| enroll      | inscribir      | E+Onset | 2.82 | 0 | 6  | 2.89 | 0  | 9  |
| ensure      | asegurar       | E+Onset | 3.70 | 3 | 6  | 4.22 | 4  | 8  |
| envelope    | sobre          | E+Onset | 4.00 | 1 | 8  | 6.05 | 6  | 5  |
| exchange    | intercambiar   | E+Onset | 4.31 | 2 | 8  | 3.68 | 0  | 12 |
| acorn       | bellota        | control | 2.86 | 3 | 5  | 2.70 | 0  | 0  |
| afford      | permitirse     | control | 4.65 | 0 | 6  | 3.37 | 3  | 10 |
| aisle       | pasillo        | control | 3.87 | 2 | 5  | 4.51 | 2  | 7  |
| alley       | callejón       | control | 4.21 | 7 | 5  | 4.19 | 0  | 8  |
| annoy       | bendición      | control | 3.40 | 1 | 5  | 4.19 | 7  | 8  |
| apology     | disculpa       | control | 4.20 | 0 | 7  | 5.10 | 7  | 8  |
| argue       | discutir       | control | 4.30 | 3 | 5  | 4.55 | 2  | 8  |
| arise       | surgir         | control | 3.47 | 3 | 5  | 3.37 | 1  | 6  |
| ashes       | cenizas        | control | 3.99 | 6 | 5  | 4.09 | 1  | 7  |
| assignment  | tarea          | control | 4.25 | 1 | 10 | 4.62 | 5  | 5  |
| award       | premio         | control | 4.11 | 3 | 5  | 4.60 | 4  | 6  |
| beginning   | principio      | control | 4.80 | 1 | 9  | 4.90 | 1  | 9  |
| behavior    | comportamiento | control | 4.35 | 1 | 8  | 4.39 | 1  | 14 |
| blessing    | bendición      | control | 3.99 | 1 | 8  | 4.17 | 1  | 9  |
| blind       | ciego          | control | 4.66 | 7 | 5  | 4.39 | 6  | 5  |
| breadth     | ancho          | control | 2.63 | 1 | 7  | 3.73 | 4  | 5  |

Running head: SPEECH PERCEPTION IN BILINGUALS

|           |              |         |      |    |   |      |    |    |
|-----------|--------------|---------|------|----|---|------|----|----|
| century   | siglo        | control | 4.32 | 0  | 7 | 4.47 | 5  | 5  |
| clearance | liquidación  | control | 3.84 | 1  | 9 | 3.36 | 0  | 11 |
| clingy    | dependiente  | control | 2.77 | 2  | 6 | 3.19 | 0  | 11 |
| crumble   | desmoronarse | control | 3.14 | 3  | 7 | 2.86 | 0  | 0  |
| cross     | cruzar       | control | 4.74 | 6  | 5 | 4.33 | 4  | 6  |
| desk      | mesa         | control | 4.64 | 5  | 4 | 5.04 | 12 | 4  |
| demand    | exigir       | control | 4.23 | 1  | 6 | 3.24 | 1  | 6  |
| frozen    | congelado    | control | 4.19 | 1  | 6 | 3.83 | 4  | 9  |
| flatten   | aplastar     | control | 3.09 | 2  | 7 | 3.52 | 2  | 8  |
| flavor    | sabor        | control | 3.70 | 2  | 6 | 4.29 | 3  | 5  |
| furnish   | amueblar     | control | 2.97 | 0  | 7 | 1.98 | 0  | 10 |
| friend    | amigo        | control | 5.62 | 3  | 6 | 5.85 | 2  | 5  |
| hammer    | martillo     | control | 4.08 | 4  | 6 | 4.08 | 1  | 8  |
| imprison  | encarcelar   | control | 2.59 | 0  | 8 | 2.97 | 0  | 10 |
| improve   | mejorar      | control | 3.91 | 2  | 7 | 4.35 | 4  | 7  |
| injure    | herir        | control | 3.00 | 3  | 6 | 3.89 | 2  | 5  |
| intrude   | meterse      | control | 3.40 | 1  | 7 | 4.12 | 3  | 7  |
| issue     | asunto       | control | 4.53 | 3  | 5 | 5.14 | 3  | 6  |
| itch      | picazón      | control | 3.62 | 9  | 4 | 3.29 | 0  | 7  |
| lawyer    | abogado      | control | 4.90 | 3  | 6 | 5.08 | 3  | 7  |
| lazy      | perezoso     | control | 4.06 | 4  | 4 | 3.45 | 2  | 8  |
| leisure   | ocio         | control | 3.40 | 0  | 7 | 3.08 | 4  | 4  |
| little    | pequeño      | control | 2.26 | 0  | 0 | 5.36 | 2  | 7  |
| narrow    | escaso       | control | 6.16 | 0  | 6 | 3.16 | 3  | 6  |
| nickname  | apodo        | control | 3.83 | 2  | 8 | 3.94 | 3  | 5  |
| nightmare | pesadilla    | control | 4.35 | 1  | 9 | 4.49 | 1  | 9  |
| old       | viejo        | control | 5.78 | 12 | 3 | 5.53 | 3  | 5  |
| onward    | adelante     | control | 3.19 | 2  | 6 | 5.43 | 5  | 8  |
| open      | abierto      | control | 5.51 | 5  | 4 | 4.66 | 3  | 7  |
| outfit    | traje        | control | 4.40 | 2  | 6 | 5.11 | 5  | 5  |
| outline   | contorno     | control | 3.31 | 3  | 7 | 2.76 | 0  | 8  |
| overcome  | vencer       | control | 3.79 | 8  | 8 | 4.20 | 7  | 7  |
| owner     | dueño        | control | 4.37 | 3  | 5 | 4.63 | 4  | 5  |
| propeller | hélice       | control | 3.18 | 1  | 9 | 3.12 | 0  | 6  |
| quirk     | manía        | control | 2.59 | 5  | 5 | 3.21 | 4  | 5  |
| rascal    | pillo        | control | 3.60 | 2  | 6 | 3.14 | 0  | 6  |
| record    | grabar       | control | 4.93 | 1  | 6 | 4.06 | 3  | 6  |
| thrive    | prosperar    | control | 3.24 | 2  | 6 | 2.87 | 0  | 6  |
| topping   | cobertura    | control | 2.95 | 8  | 7 | 3.57 | 1  | 12 |
| target    | blanco       | control | 4.58 | 1  | 6 | 5.05 | 5  | 6  |

Running head: SPEECH PERCEPTION IN BILINGUALS

|            |               |         |      |   |    |      |   |    |
|------------|---------------|---------|------|---|----|------|---|----|
| trade      | intercambio   | control | 4.55 | 5 | 5  | 4.20 | 0 | 11 |
| travel     | viajar        | control | 4.52 | 3 | 6  | 4.23 | 2 | 6  |
| umbrella   | paraguas      | control | 3.87 | 1 | 8  | 3.55 | 0 | 8  |
| unable     | incapaz       | control | 4.01 | 2 | 6  | 3.93 | 0 | 7  |
| unlock     | abrir         | control | 3.74 | 0 | 6  | 4.81 | 4 | 5  |
| unpack     | deshacer      | control | 3.51 | 0 | 6  | 3.67 | 2 | 8  |
| untangle   | desenredar    | control | 2.46 | 1 | 8  | 2.34 | 0 | 10 |
| update     | actualización | control | 3.69 | 2 | 6  | 3.35 | 0 | 13 |
| upper      | superior      | control | 4.08 | 3 | 5  | 4.48 | 0 | 8  |
| understand | comprender    | control | 5.68 | 1 | 10 | 4.20 | 4 | 10 |
| village    | pueblo        | control | 4.53 | 2 | 7  | 5.16 | 1 | 6  |
| wallow     | revolcarse    | control | 3.21 | 5 | 6  | 2.70 | 0 | 0  |
| woman      | mujer         | control | 5.64 | 2 | 5  | 5.72 | 0 | 5  |
| window     | ventana       | control | 4.93 | 2 | 6  | 4.86 | 2 | 7  |
| worker     | trabajador    | control | 4.04 | 4 | 6  | 3.91 | 2 | 10 |
| wrangler   | pendenciero   | control | 2.30 | 0 | 1  | 2.61 | 0 | 0  |

## Appendix 2

Stimuli and lexical characteristics for Vowel Detection and Lexical Decision Tasks (Experiment 2 and 3). Key: Word = English word; Sp. Trans = Spanish translation; Condition = Condition within the experiment; Eng. Log. Freq. = Log frequency in English (CLEARPOND); Eng. Ortho. N. = English Orthographic Neighborhood Size (CLEARPOND); Eng. Letters = Number of English letters; Sp. Log. Freq. = Log frequency in Spanish (CLEARPOND); Sp. Ortho. N. = Spanish Orthographic Neighborhood Size (CLEARPOND); Sp. Letters = Number of Spanish letters. Nonword = Nonword; Length = Number of letters; TotalND = Total neighborhood density (English). \* Indicates a cognate between English and Spanish.

| Word      | Sp. Trans  | Condition | Eng. Log. Freq. | Eng. Ortho. N. | Eng. Letters | Sp. Log. Freq. | Sp. Ortho. N. | Sp. Letters |
|-----------|------------|-----------|-----------------|----------------|--------------|----------------|---------------|-------------|
| spa       | balneario  | S+Cons    | 3.67            | 7              | 3            | 2.97           | 0             | 9           |
| space*    | espacio    | S+Cons    | 4.82            | 7              | 5            | 4.90           | 2             | 7           |
| speaker   | altavoz    | S+Cons    | 3.84            | 2              | 7            | 3.05           | 0             | 7           |
| special*  | especial   | S+Cons    | 5.17            | 1              | 7            | 5.22           | 3             | 8           |
| specific* | específico | S+Cons    | 4.25            | 1              | 8            | 4.01           | 2             | 10          |
| spider    | araña      | S+Cons    | 4.00            | 2              | 6            | 4.18           | 1             | 5           |
| spiral*   | espiral    | S+Cons    | 3.25            | 1              | 6            | 3.53           | 1             | 7           |
| spirit*   | espíritu   | S+Cons    | 4.69            | 1              | 6            | 4.75           | 1             | 8           |
| split     | dividido   | S+Cons    | 4.58            | 5              | 5            | 3.48           | 2             | 8           |
| sponge*   | esponja    | S+Cons    | 3.83            | 1              | 6            | 3.85           | 1             | 7           |
| spotless  | inmaculado | S+Cons    | 3.07            | 0              | 8            | 2.83           | 1             | 10          |
| spread    | difundir   | S+Cons    | 4.50            | 1              | 6            | 3.05           | 0             | 8           |
| stable*   | estable    | S+Cons    | 4.12            | 5              | 6            | 4.11           | 3             | 7           |
| starch    | almidón    | S+Cons    | 3.13            | 1              | 6            | 2.95           | 0             | 7           |
| station*  | estación   | S+Cons    | 4.90            | 1              | 7            | 4.75           | 0             | 8           |
| stench    | hedor      | S+Cons    | 3.35            | 0              | 6            | 3.39           | 0             | 5           |
| stereo*   | estéreo    | S+Cons    | 3.78            | 1              | 6            | 3.56           | 0             | 7           |
| stocking  | media      | S+Cons    | 3.42            | 4              | 8            | 4.96           | 5             | 5           |
| stoic*    | estoico    | S+Cons    | 2.61            | 0              | 5            | 2.23           | 0             | 7           |
| stricken  | afligido   | S+Cons    | 3.17            | 0              | 8            | 3.12           | 1             | 8           |
| strict*   | estricto   | S+Cons    | 3.85            | 0              | 6            | 3.62           | 2             | 8           |
| strong    | fuerte     | S+Cons    | 4.94            | 2              | 6            | 5.29           | 4             | 6           |

Running head: SPEECH PERCEPTION IN BILINGUALS

|            |                |               |      |    |    |      |   |    |
|------------|----------------|---------------|------|----|----|------|---|----|
| study*     | estudiar       | S+Cons        | 4.69 | 3  | 5  | 4.56 | 3 | 8  |
| stumble    | trastabillar   | S+Cons        | 3.29 | 4  | 7  | 2.16 | 0 | 12 |
| behavior   | comportamiento | control-cons  | 4.35 | 1  | 8  | 4.39 | 1 | 14 |
| blessing   | bendición      | control-cons  | 3.99 | 1  | 8  | 4.17 | 1 | 9  |
| breadth    | ancho          | control-cons  | 2.63 | 1  | 7  | 3.73 | 4 | 5  |
| friend     | amigo          | control-cons  | 5.62 | 3  | 6  | 5.85 | 2 | 5  |
| hammer     | martillo       | control-cons  | 4.08 | 4  | 6  | 4.08 | 1 | 8  |
| lawyer     | abogado        | control-cons  | 4.90 | 3  | 6  | 5.08 | 3 | 7  |
| nickname   | apodo          | control-cons  | 3.83 | 2  | 8  | 3.94 | 3 | 5  |
| quirk      | manía          | control-cons  | 2.59 | 5  | 5  | 3.21 | 4 | 5  |
| rascal     | pillo          | control-cons  | 3.60 | 2  | 6  | 3.14 | 0 | 6  |
| thrive     | prosperar      | control-cons  | 3.24 | 2  | 6  | 2.87 | 0 | 6  |
| topping    | cobertura      | control-cons  | 2.95 | 8  | 7  | 3.98 | 0 | 9  |
| travel     | viajar         | control-cons  | 4.52 | 3  | 6  | 4.23 | 2 | 6  |
| village    | pueblo         | control-cons  | 4.53 | 2  | 7  | 5.16 | 1 | 6  |
| window     | ventana        | control-cons  | 4.93 | 2  | 6  | 4.86 | 2 | 7  |
| worker     | trabajador     | control-cons  | 4.04 | 4  | 6  | 3.91 | 2 | 10 |
| yeast      | levadura       | control-cons  | 2.94 | 4  | 5  | 2.66 | 0 | 9  |
| beginning  | principio      | control-cons  | 4.80 | 1  | 9  | 4.90 | 1 | 9  |
| century    | siglo          | control-cons  | 4.32 | 0  | 7  | 4.47 | 5 | 5  |
| clearance  | liquidación    | control-cons  | 3.84 | 1  | 9  | 3.36 | 0 | 11 |
| clingy     | dependiente    | control-cons  | 2.77 | 2  | 6  | 3.19 | 0 | 11 |
| crumble    | desmoronarse   | control-cons  | 3.14 | 1  | 9  | 2.86 | 0 | 0  |
| cross      | cruzar         | control-cons  | 4.74 | 6  | 5  | 4.33 | 4 | 6  |
| propeller  | hélice         | control-cons  | 3.18 | 1  | 9  | 3.12 | 0 | 6  |
| toying     | jugando        | control-cons  | 3.05 | 4  | 6  | 4.84 | 2 | 7  |
| afford     | permitirse     | control-vowel | 4.65 | 0  | 6  | 3.37 | 3 | 10 |
| acorn      | bellota        | control-vowel | 2.86 | 3  | 5  | 2.70 | 0 | 0  |
| aisle      | pasillo        | control-vowel | 3.87 | 2  | 5  | 4.51 | 2 | 7  |
| alley      | callejón       | control-vowel | 4.21 | 7  | 5  | 4.19 | 0 | 8  |
| annoy      | bendición      | control-vowel | 3.40 | 1  | 5  | 4.19 | 7 | 8  |
| apology    | disculpa       | control-vowel | 4.20 | 0  | 7  | 5.10 | 7 | 8  |
| argue      | discutir       | control-vowel | 4.30 | 3  | 5  | 4.55 | 2 | 8  |
| arise      | surgir         | control-vowel | 3.47 | 3  | 5  | 3.37 | 1 | 6  |
| ashes      | cenizas        | control-vowel | 3.99 | 6  | 5  | 4.09 | 1 | 7  |
| assignment | tarea          | control-vowel | 4.25 | 1  | 10 | 4.62 | 5 | 5  |
| award      | premio         | control-vowel | 4.11 | 3  | 5  | 4.60 | 4 | 6  |
| earn       | ganar          | control-vowel | 4.19 | 11 | 4  | 5.07 | 7 | 5  |
| easily     | fácilmente     | control-vowel | 4.35 | 0  | 6  | 4.33 | 0 | 10 |
| edge       | borde          | control-vowel | 4.37 | 5  | 4  | 4.23 | 4 | 5  |

Running head: SPEECH PERCEPTION IN BILINGUALS

|            |               |               |      |    |    |      |    |    |
|------------|---------------|---------------|------|----|----|------|----|----|
| egg        | huevo         | control-vowel | 4.42 | 2  | 3  | 4.28 | 6  | 5  |
| elbow      | codo          | control-vowel | 3.79 | 1  | 5  | 3.73 | 16 | 4  |
| elevator   | ascensor      | control-vowel | 4.39 | 1  | 8  | 4.30 | 1  | 8  |
| elope      | fugarse       | control-vowel | 3.12 | 2  | 5  | 2.92 | 0  | 7  |
| ember      | brasa         | control-vowel | 2.34 | 2  | 5  | 2.90 | 4  | 5  |
| embrace    | abrazo        | control-vowel | 3.88 | 2  | 7  | 4.31 | 4  | 6  |
| enroll     | inscribir     | control-vowel | 2.82 | 0  | 6  | 2.89 | 0  | 9  |
| ensure     | asegurar      | control-vowel | 3.70 | 3  | 6  | 4.22 | 4  | 8  |
| erase      | borrar        | control-vowel | 3.79 | 4  | 5  | 3.96 | 2  | 6  |
| exit       | salida        | control-vowel | 4.19 | 4  | 4  | 4.87 | 8  | 6  |
| icebreaker | rompehielos   | control-vowel | 2.61 | 10 | 10 | 0.00 | 0  | 11 |
| imprison   | encarcelar    | control-vowel | 2.59 | 0  | 8  | 2.97 | 0  | 10 |
| improve    | mejorar       | control-vowel | 3.91 | 2  | 7  | 4.35 | 4  | 7  |
| injure     | herir         | control-vowel | 3.00 | 3  | 6  | 3.89 | 1  | 5  |
| intrude    | meterse       | control-vowel | 3.40 | 1  | 7  | 4.12 | 3  | 7  |
| issue      | asunto        | control-vowel | 4.53 | 3  | 5  | 5.14 | 3  | 6  |
| itch       | picazón       | control-vowel | 3.62 | 9  | 4  | 3.29 | 0  | 7  |
| old        | viejo         | control-vowel | 5.78 | 12 | 3  | 5.53 | 3  | 5  |
| oncoming   | venidero      | control-vowel | 2.63 | 8  | 8  | 2.38 | 0  | 8  |
| onward     | adelante      | control-vowel | 3.19 | 2  | 6  | 5.43 | 5  | 8  |
| open       | abierto       | control-vowel | 5.51 | 5  | 4  | 4.66 | 3  | 7  |
| outfit     | traje         | control-vowel | 4.40 | 2  | 6  | 5.11 | 5  | 5  |
| outline    | contorno      | control-vowel | 3.31 | 3  | 7  | 2.76 | 0  | 8  |
| overcome   | vencer        | control-vowel | 3.79 | 8  | 8  | 4.20 | 7  | 7  |
| owe        | deber         | control-vowel | 4.87 | 12 | 3  | 4.46 | 6  | 5  |
| own        | dueño         | control-vowel | 5.66 | 8  | 3  | 4.63 | 4  | 5  |
| umbrella   | paraguas      | control-vowel | 3.87 | 1  | 8  | 3.55 | 0  | 8  |
| unable     | incapaz       | control-vowel | 4.01 | 2  | 6  | 3.93 | 0  | 7  |
| unlock     | abrir         | control-vowel | 3.74 | 0  | 6  | 4.81 | 4  | 5  |
| unpack     | deshacer      | control-vowel | 3.51 | 0  | 6  | 3.67 | 2  | 8  |
| untangle   | desenredar    | control-vowel | 2.46 | 1  | 8  | 2.34 | 0  | 10 |
| update     | actualización | control-vowel | 3.69 | 2  | 6  | 3.35 | 0  | 13 |
| upper      | superior      | control-vowel | 4.08 | 3  | 5  | 4.48 | 0  | 8  |
| understand | comprender    | control-vowel | 5.68 | 1  | 10 | 4.20 | 4  | 10 |

| Nonword | Condition | Length | TotalND |
|---------|-----------|--------|---------|
| spap    | S+C_nw    |        | 4       |
| spuv    | S+C_nw    |        | 4       |
| spash   | S+C_nw    |        | 5       |

Running head: SPEECH PERCEPTION IN BILINGUALS

|         |                 |   |   |
|---------|-----------------|---|---|
| spess   | S+C_nw          | 5 | 1 |
| spet    | S+C_nw          | 4 | 9 |
| spold   | S+C_nw          | 5 | 2 |
| spinge  | S+C_nw          | 6 | 2 |
| spelg   | S+C_nw          | 5 | 1 |
| spont   | S+C_nw          | 5 | 4 |
| sporl   | S+C_nw          | 5 | 3 |
| spown   | S+C_nw          | 5 | 4 |
| spuck   | S+C_nw          | 5 | 6 |
| stalve  | S+C_nw          | 6 | 3 |
| stish   | S+C_nw          | 5 | 3 |
| stoil   | S+C_nw          | 5 | 5 |
| stees   | S+C_nw          | 5 | 8 |
| sterk   | S+C_nw          | 5 | 4 |
| staifs  | S+C_nw          | 6 | 3 |
| stigs   | S+C_nw          | 5 | 2 |
| stav    | S+C_nw          | 4 | 5 |
| stoz    | S+C_nw          | 4 | 2 |
| stolt   | S+C_nw          | 5 | 2 |
| stind   | S+C_nw          | 5 | 4 |
| sturf   | S+C_nw          | 5 | 3 |
| barsh   | control-cons-nw | 5 | 5 |
| breleh  | control-cons-nw | 6 | 2 |
| brolf   | control-cons-nw | 5 | 0 |
| blout   | control-cons-nw | 5 | 5 |
| brud    | control-cons-nw | 4 | 4 |
| chool   | control-cons-nw | 5 | 2 |
| charks  | control-cons-nw | 6 | 3 |
| clant   | control-cons-nw | 5 | 8 |
| ferched | control-cons-nw | 7 | 2 |
| flades  | control-cons-nw | 6 | 6 |
| flafe   | control-cons-nw | 5 | 3 |
| fraik   | control-cons-nw | 5 | 2 |
| gault   | control-cons-nw | 5 | 4 |
| gisque  | control-cons-nw | 6 | 1 |
| gerf    | control-cons-nw | 4 | 2 |
| jorst   | control-cons-nw | 5 | 3 |
| koid    | control-cons-nw | 4 | 3 |
| kimps   | control-cons-nw | 5 | 2 |
| narned  | control-cons-nw | 6 | 3 |

Running head: SPEECH PERCEPTION IN BILINGUALS

|        |                  |   |    |
|--------|------------------|---|----|
| nulse  | control-cons-nw  | 5 | 2  |
| prifed | control-cons-nw  | 6 | 3  |
| thoob  | control-cons-nw  | 5 | 1  |
| vob    | control-cons-nw  | 3 | 10 |
| zeen   | control-cons-nw  | 4 | 7  |
| anch   | control-vowel-nw | 4 | 2  |
| aived  | control-vowel-nw | 5 | 6  |
| arp    | control-vowel-nw | 3 | 10 |
| alfs   | control-vowel-nw | 4 | 4  |
| alked  | control-vowel-nw | 5 | 3  |
| arged  | control-vowel-nw | 5 | 5  |
| arns   | control-vowel-nw | 4 | 5  |
| arped  | control-vowel-nw | 5 | 2  |
| asped  | control-vowel-nw | 5 | 3  |
| atch   | control-vowel-nw | 4 | 10 |
| almed  | control-vowel-nw | 5 | 3  |
| awned  | control-vowel-nw | 5 | 3  |
| eague  | control-vowel-nw | 5 | 1  |
| ect    | control-vowel-nw | 3 | 3  |
| eamed  | control-vowel-nw | 5 | 6  |
| eants  | control-vowel-nw | 5 | 4  |
| eash   | control-vowel-nw | 4 | 17 |
| ense   | control-vowel-nw | 4 | 3  |
| elt    | control-vowel-nw | 3 | 10 |
| eeth   | control-vowel-nw | 4 | 4  |
| enting | control-vowel-nw | 6 | 4  |
| eened  | control-vowel-nw | 5 | 0  |
| erves  | control-vowel-nw | 5 | 3  |
| ict    | control-vowel-nw | 3 | 4  |
| imes   | control-vowel-nw | 4 | 3  |
| iln    | control-vowel-nw | 3 | 5  |
| imed   | control-vowel-nw | 4 | 4  |
| ines   | control-vowel-nw | 4 | 9  |
| ints   | control-vowel-nw | 4 | 7  |
| ipes   | control-vowel-nw | 4 | 3  |
| ilch   | control-vowel-nw | 4 | 3  |
| isked  | control-vowel-nw | 5 | 2  |
| oalls  | control-vowel-nw | 5 | 6  |
| oamed  | control-vowel-nw | 5 | 4  |
| obs    | control-vowel-nw | 3 | 7  |

Running head: SPEECH PERCEPTION IN BILINGUALS

|       |                  |   |    |
|-------|------------------|---|----|
| ogged | control-vowel-nw | 5 | 4  |
| onch  | control-vowel-nw | 4 | 4  |
| oones | control-vowel-nw | 5 | 7  |
| oped  | control-vowel-nw | 4 | 8  |
| onth  | control-vowel-nw | 4 | 1  |
| orvs  | control-vowel-nw | 4 | 2  |
| udds  | control-vowel-nw | 4 | 2  |
| udge  | control-vowel-nw | 4 | 6  |
| uff   | control-vowel-nw | 3 | 10 |
| unks  | control-vowel-nw | 4 | 3  |
| urbed | control-vowel-nw | 5 | 2  |
| urped | control-vowel-nw | 5 | 2  |
| utch  | control-vowel-nw | 4 | 5  |
